# Supplementary material
Source: PubMed Central journal article supplement (PMC7429258)
Supplement: NIHMS1610579-supplement-Supplemental_Material.pdf [file NIHMS1610579-supplement-Supplemental_Material.pdf]

## **SUPPORTING INFORMATION**

# **[<sup>99m</sup>Tc]Tc-DGA1, a Promising CCK<sub>2</sub>R-Antagonist-Based Tracer for Tumor Diagnosis with SPECT**

*Aikaterini Kaloudi,<sup>†</sup> Panagiotis Kanellopoulos,<sup>†</sup> Thorsten Radolf,<sup>‡</sup> Oleg G. Chepurny,<sup>§</sup> Martina Rouchota,<sup>¶</sup> George Loudos,<sup>¶</sup> Fritz Andreae,<sup>‡</sup> George G. Holz,<sup>§</sup> Berthold Artur Nock<sup>†</sup> and Theodosia Maina<sup>†\*</sup>*

<sup>†</sup>Molecular Radiopharmacy, INRASTES, NCSR “Demokritos”, 15310 Athens, Greece

<sup>‡</sup>piCHEM Forschungs-und Entwicklungs GmbH, Parkring 3, 8074 Grambach, Austria

<sup>§</sup>SUNY Upstate Medical University, IHP4310 at 505 Irving Ave., Syracuse, NY 13210, USA

<sup>¶</sup>BIOEMTECH, Lefkippos Attica Technology Park NCSR “Demokritos”, 15310 Athens, Greece

**A**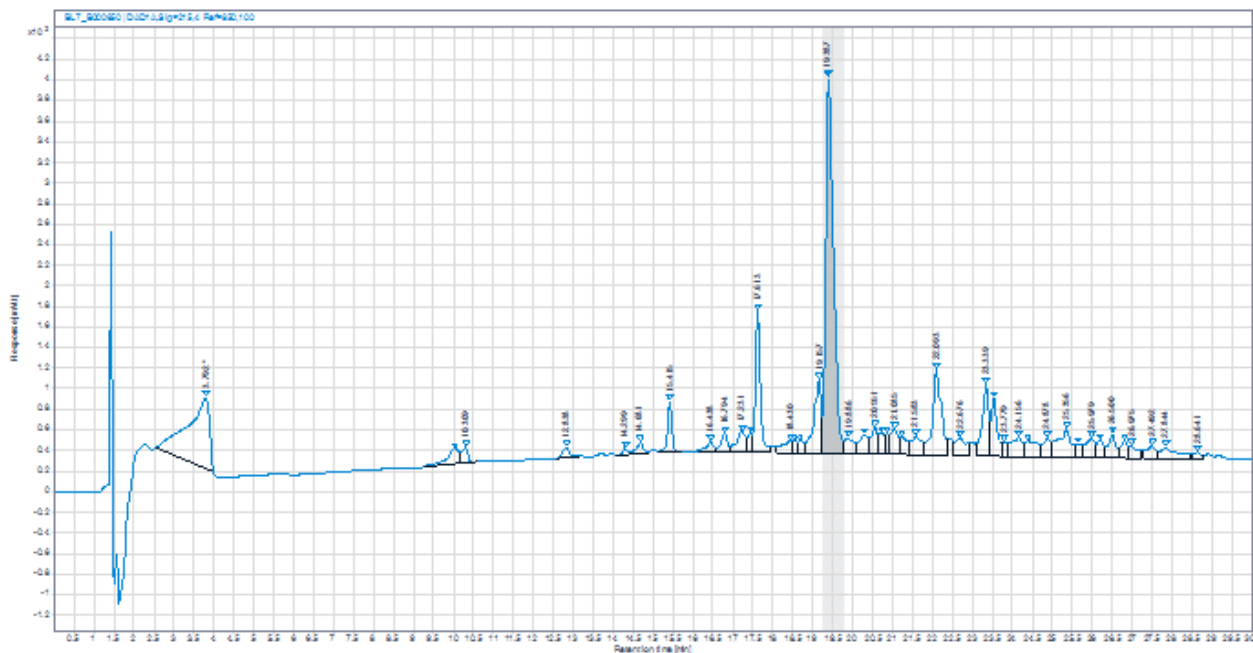**B**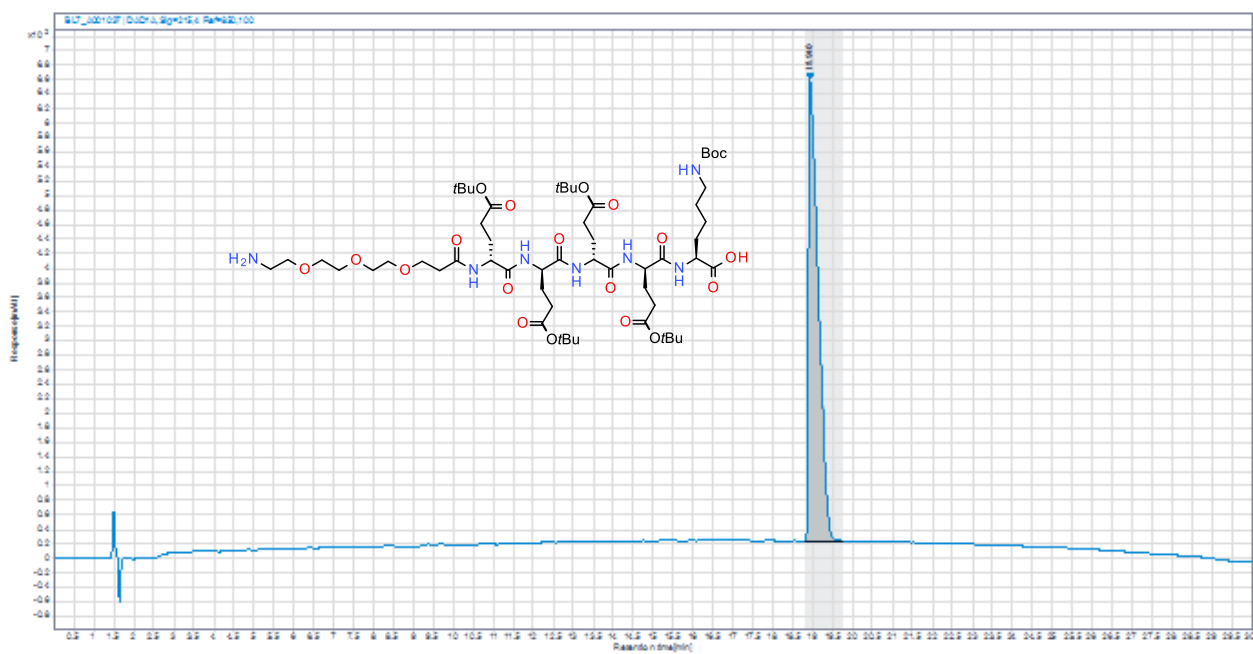

**Figure S1.** RP-HPLC UV traces (215 nm) of H-PEG<sub>3</sub>-[DGlu(O<sup>t</sup>Bu)]<sub>4</sub>-Lys(Boc)-OH (**A**) before and (**B**) after purification.

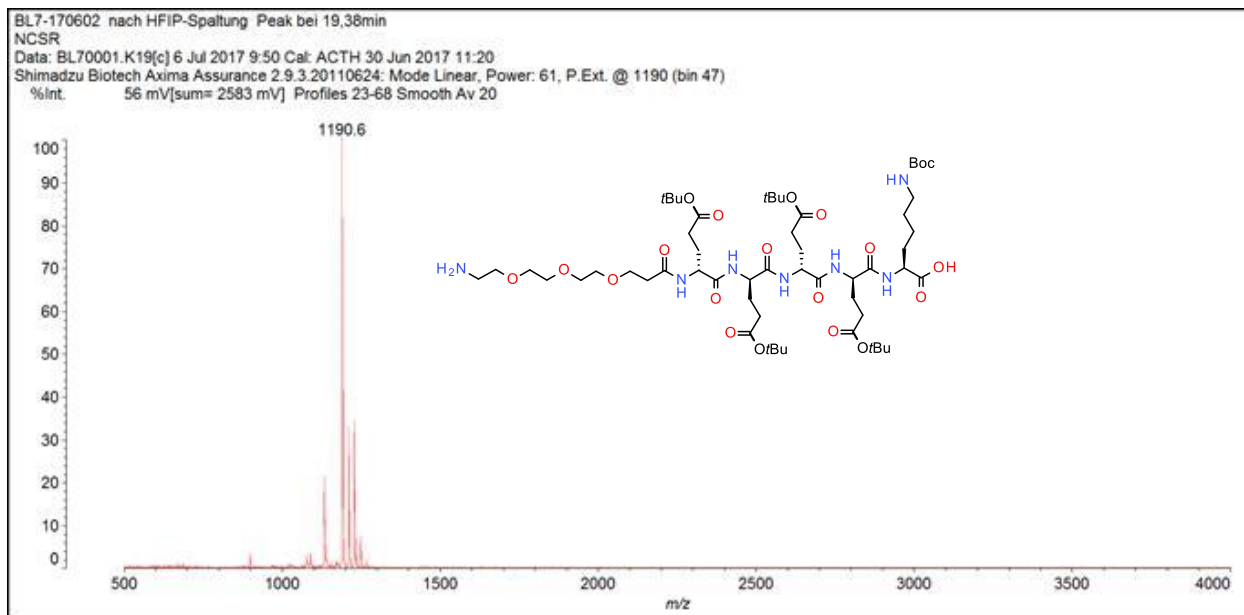

**Figure S2.** MALDI-TOF-MS spectrum of purified H-PEG<sub>3</sub>-[DGLu(O<sup>t</sup>Bu)]<sub>4</sub>-Lys(Boc)-OH, m/z calculated for C<sub>56</sub>H<sub>99</sub>N<sub>7</sub>O<sub>20</sub> (M+H)<sup>+</sup>: 1190.7, found: 1190.6



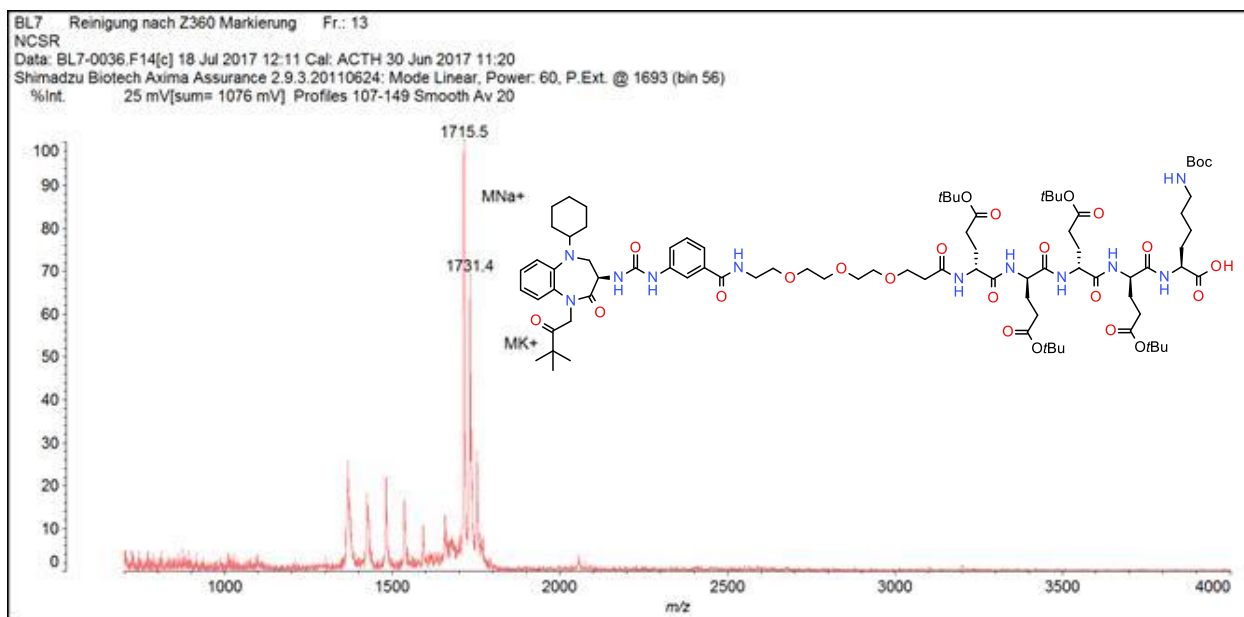

**Figure S4.** MALDI-TOF-MS spectrum of Z-360-PEG<sub>3</sub>-[DGLu(O<sup>t</sup>Bu)]<sub>4</sub>-Lys(Boc)-OH, m/z calculated for C<sub>85</sub>H<sub>133</sub>N<sub>11</sub>O<sub>24</sub>Na (M+Na)<sup>+</sup>: 1715.9, found: 1715.5 and m/z calculated for (M+K)<sup>+</sup>: 1730.9, found: 1731.4

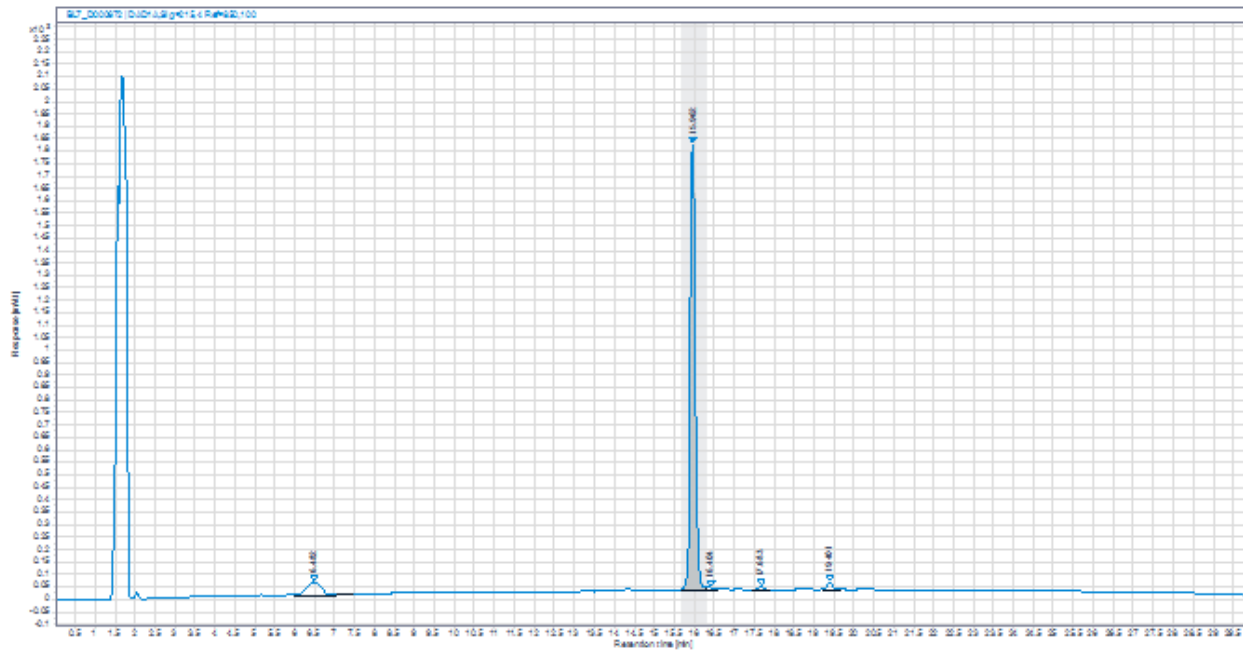

**Figure S5.** RP-HPLC UV trace (215 nm) of Z-360-PEG<sub>3</sub>-(DGlu)<sub>4</sub>-Lys-OH

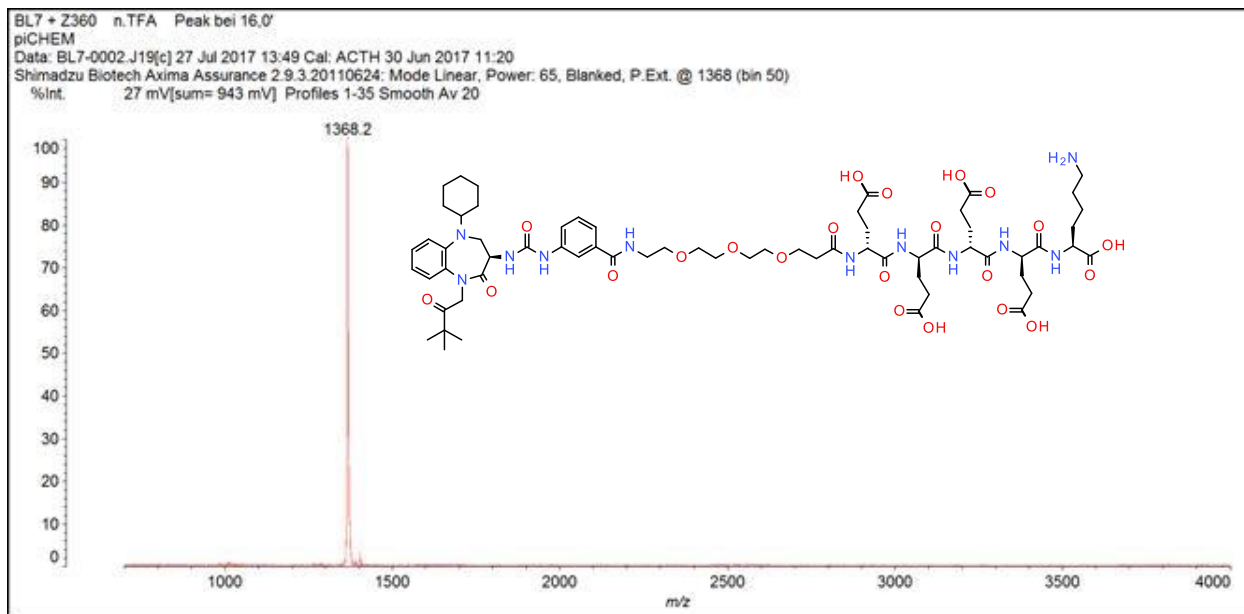

**Figure S6.** MALDI-TOF-MS spectrum of purified Z-360-PEG<sub>3</sub>-(DGlu)<sub>4</sub>-Lys-OH, m/z calculated for C<sub>64</sub>H<sub>93</sub>N<sub>11</sub>O<sub>22</sub> (M+H)<sup>+</sup>: 1368.6, found: 1368.2

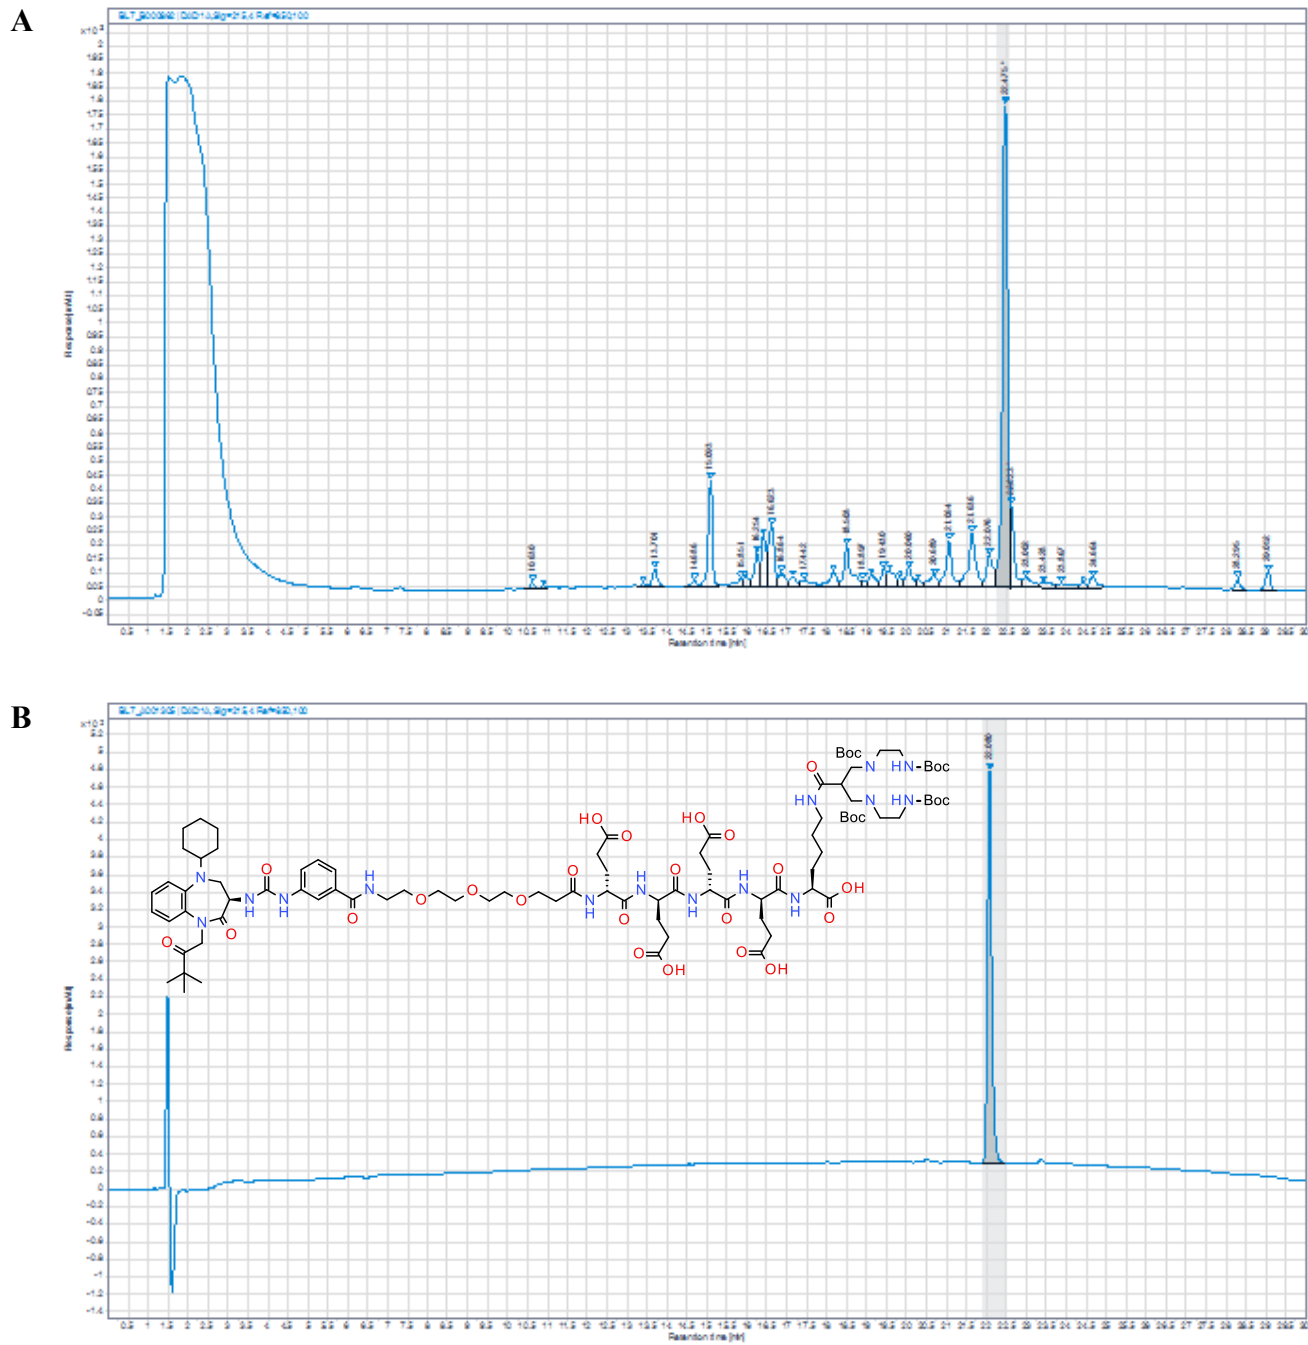

**Figure S7.** RP-HPLC UV traces (215 nm) of Z-360-PEG<sub>3</sub>-(DGlu)<sub>4</sub>-Lys[N<sub>4</sub>(Boc)<sub>4</sub>]-OH (**A**) before and (**B**) after purification



**A**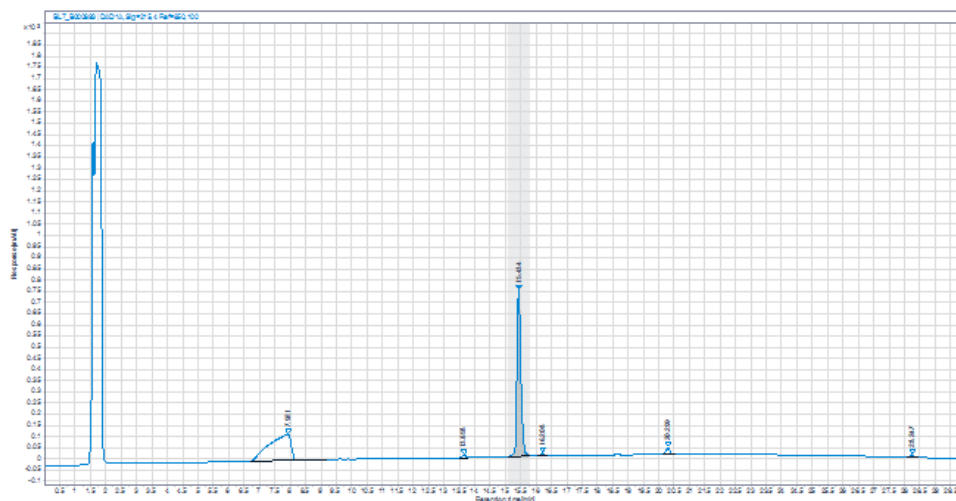**B**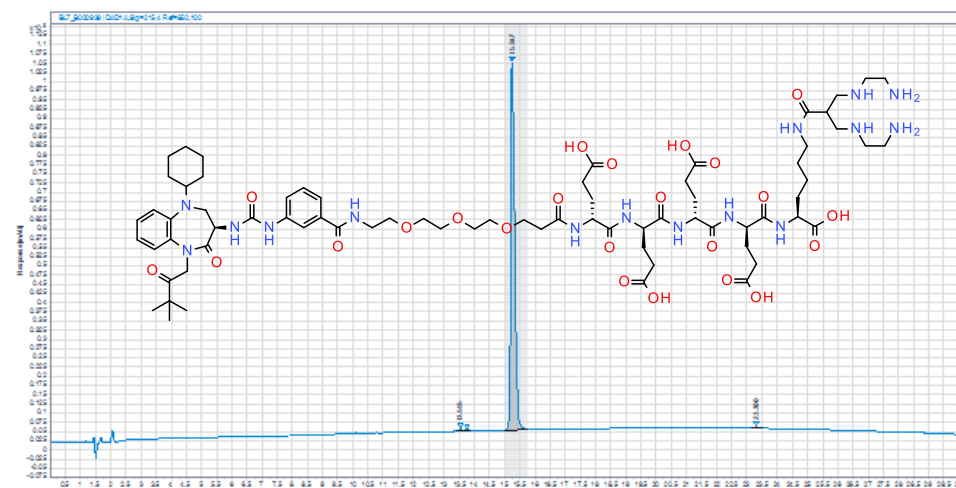**C**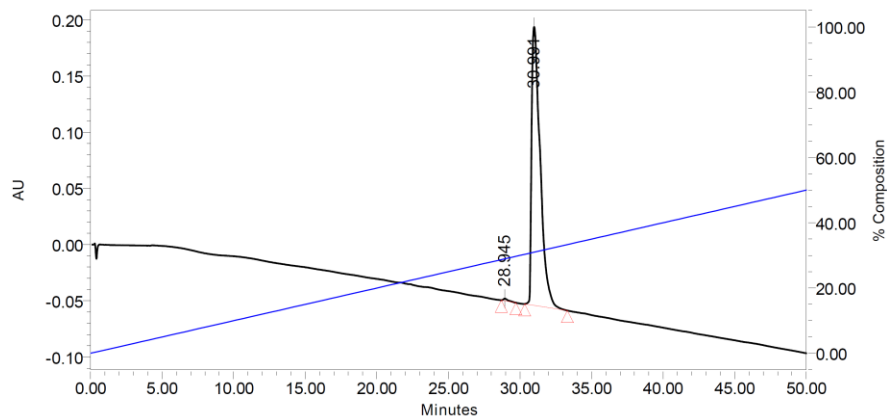

**Figure S8.** RP-HPLC UV traces (215 nm) of DGA1 (**A**) before and (**B**) after purification applying system 1 or (**C**) system 2, revealing an >96% purity for the lyophilized end-product

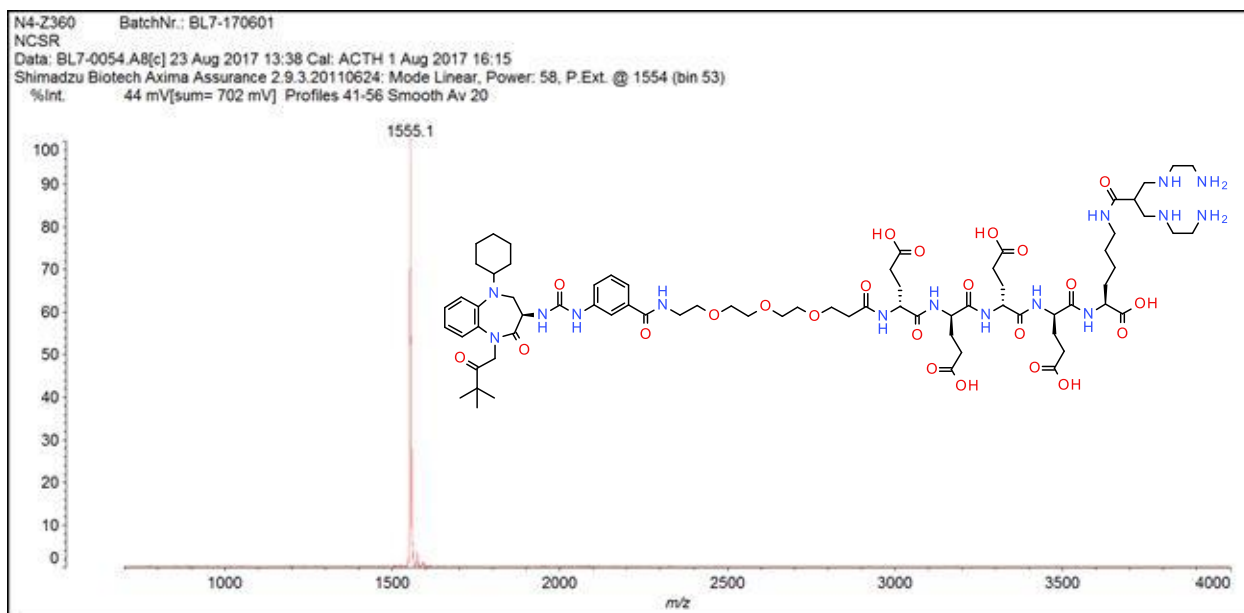

**Figure S9.** MALDI-TOF-MS spectrum of DGA1, m/z calculated for  $C_{72}H_{112}N_{15}O_{23}$  (M+H)<sup>+</sup>:  
 1554.8, found: 1555.1

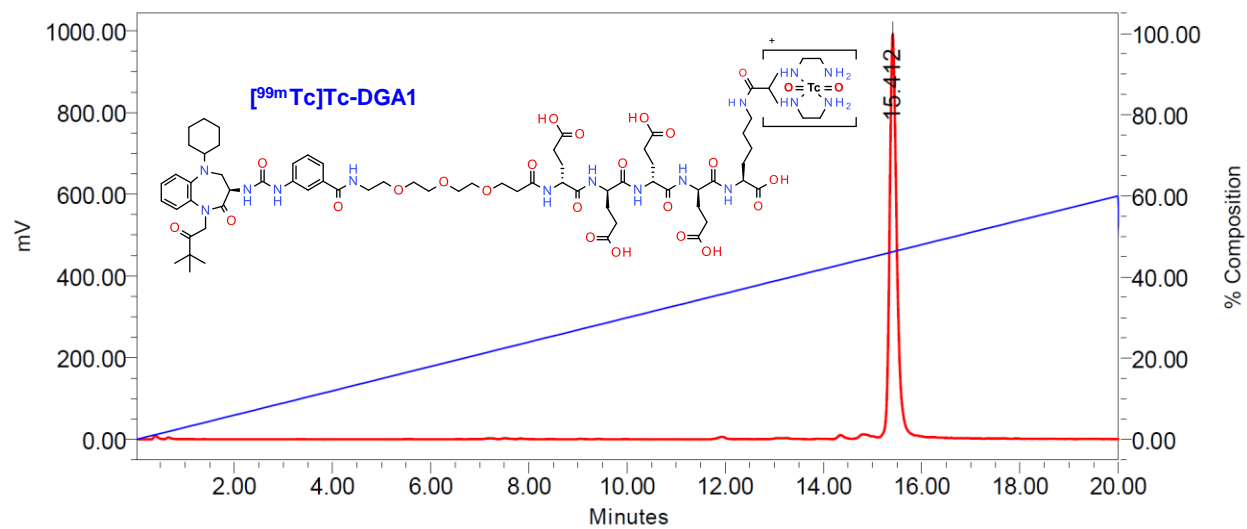

**Figure S10.** Representative HPLC radiochromatogram of a  $[^{99m}\text{Tc}]\text{Tc}$ -labeling solution of DGA1 applying system 3

**A**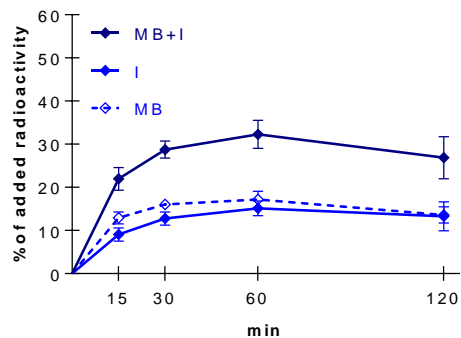**B**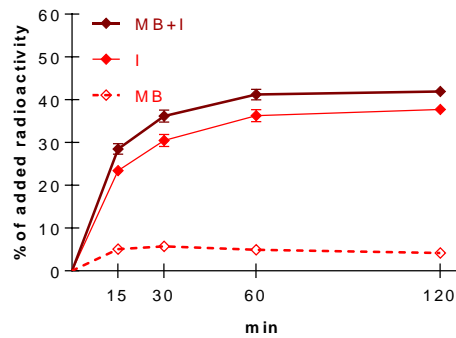

**Figure S11.** Specific cell-association rates of (A) [ $^{99m}\text{Tc}$ ]Tc-DGA1 (blue) and (B) [ $^{99m}\text{Tc}$ ]Tc-DG2 (red) in HEK293-CCK<sub>2</sub>R cells at 37 °C; solid lines represent the internalized (I) and scattered lines the membrane bound fractions (MB), whereas the darker solid lines represent specific total cell uptake (MB+I); results represent mean values $\pm$ SD, n = 3.

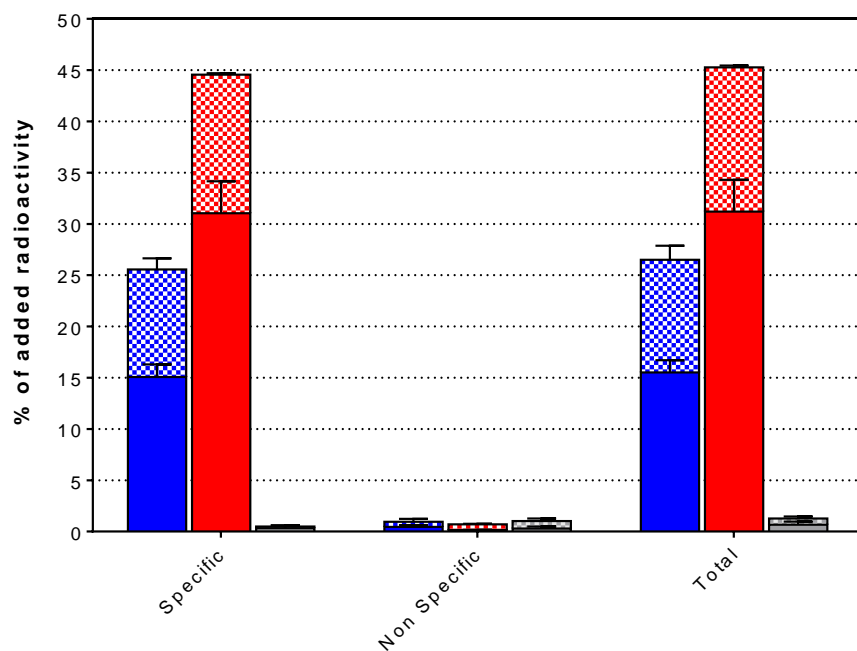

**Figure S12.** Cell-association (internalized: solid bars and membrane-bound fractions: checkered bars) of [<sup>99m</sup>Tc]Tc-DGA1 (blue) and [<sup>99m</sup>Tc]Tc-DG2 (red) in HEK293-CCK<sub>2i4svR</sub> cells and of [<sup>99m</sup>Tc]Tc-DGA1 in HEK293T cells at 37 °C at 1 h, including total, non-specific (in the presence of 1 μM DG2) and specific values; results represent mean values±SD, n = 3.

**Table S1.** Biodistribution of [<sup>99m</sup>Tc]Tc-DGA1 and [<sup>99m</sup>Tc]Tc-DG2 in SCID mice bearing twin HEK293-CCK<sub>2</sub>R positive and HEK293-CCK<sub>2</sub>R negative tumors at 1, 4 and 24 h pi, expressed as %ID/g and representing mean values±SD, n=4.

| Organs                               | %ID/g ± SD, n=4             |                    |                   |                            |                   |                   |
|--------------------------------------|-----------------------------|--------------------|-------------------|----------------------------|-------------------|-------------------|
|                                      | [ <sup>99m</sup> Tc]Tc-DGA1 |                    |                   | [ <sup>99m</sup> Tc]Tc-DG2 |                   |                   |
|                                      | 1 h                         | 4 h                | 24 h              | 1 h                        | 4 h               | 24 h              |
| <b>Blood</b>                         | 10.18±1.11                  | 1.02±0.11          | 0.09±0.03         | 0.65±0.02                  | 0.16±0.02         | 0.34±0.38         |
| <b>Liver</b>                         | 4.62±0.66                   | 1.86±0.19          | 0.39±0.07         | 0.55±0.01                  | 0.26±0.03         | 0.10±0.01         |
| <b>Heart</b>                         | 3.11±0.55                   | 0.64±0.06          | 0.10±0.02         | 0.39±0.01                  | 0.13±0.01         | 0.09±0.01         |
| <b>Kidneys</b>                       | <b>133.14±3.01</b>          | <b>113.3±10.45</b> | <b>15.81±1.65</b> | <b>82.99±14.51</b>         | <b>37.28±2.80</b> | <b>13.40±3.24</b> |
| <b>Stomach</b>                       | 2.49±0.15                   | 0.86±0.15          | 0.25±0.03         | 4.77±0.70                  | 2.39±0.56         | 0.74±0.16         |
| <b>Intestines</b>                    | 1.68±0.21                   | 0.89±0.20          | 0.41±0.09         | 0.63±0.19                  | 0.63±0.11         | 0.34±0.11         |
| <b>Spleen</b>                        | 2.09±0.23                   | 0.82±0.21          | 0.37±0.06         | 0.37±0.09                  | 0.19±0.03         | 0.30±0.00         |
| <b>Muscle</b>                        | 1.01±0.09                   | 0.19±0.01          | 0.05±0.01         | 0.16±0.06                  | 0.04±0.01         | 0.04±0.01         |
| <b>Lungs</b>                         | 4.86±0.44                   | 1.00±0.11          | 0.19±0.01         | 0.63±0.18                  | 0.15±0.03         | 0.07±0.00         |
| <b>Pancreas</b>                      | 2.14±0.12                   | 0.36±0.04          | 0.07±0.01         | 1.38±0.06                  | 0.14±0.02         | 0.08±0.01         |
| <b>HEK293-CCK<sub>2</sub>R tumor</b> | <b>39.64±2.84</b>           | <b>33.58±6.54</b>  | <b>12.50±2.53</b> | <b>11.18±1.93</b>          | <b>8.71±1.06</b>  | <b>7.40±2.43</b>  |
| <b>HEK293T tumor</b>                 | <b>2.23±0.25</b>            | <b>0.55±0.52</b>   | <b>0.18±0.03</b>  | <b>0.46±0.09</b>           | <b>0.27±0.08</b>  | <b>0.14±0.01</b>  |
